# Supplementary material for: Reproductive Hormones Mediate Intestinal Microbiota Shifts during Estrus Synchronization in Grazing Simmental Cows
Source: MDPI journal article supplement (doi:10.3390/ani12141751), 2022-07-07
Supplement: s1 [file s1]

## Supplementary materials

**Table S1.** The chemical compositions of the herbage.

| Itmes                               | Values |
|-------------------------------------|--------|
| Dry matter (DM), %                  | 34.7   |
| Chemical composition, % DM          |        |
| Crude protein                       | 16.9   |
| Acid detergent fiber                | 37.6   |
| Neutral detergent fiber             | 63.4   |
| Ether extract                       | 3.3    |
| Ash                                 | 9.6    |
| Non-fiber carbohydrate <sup>1</sup> | 12.7   |
| Starch                              | 382    |
| Calcium                             | 0.61   |
| Phosphorus                          | 0.33   |

<sup>1</sup> Non-fiber carbohydrate is calculated as  $100 - (\text{crude protein} + \text{ether extract} + \text{ash} + \text{neutral detergent fiber})$ .

### Method:

Starter samples were analyzed for DM (method 930.15) [47], crude protein (method 976.05) [47], ether extract (method 920.39) [47], calcium (method 985.35) [47], and phosphorus (method 986.24) [47]. Starch was analyzed using a modified glucoamylase method [48]. Starch was hydrolyzed to free D-glucose, and the glucose concentration was then measured. Neutral detergent fiber (NDF) and acid detergent fiber (ADF) were determined according to methods of Van Soest et al. (1991) [49] with an Ankom 220 Fiber Analyzer (Ankom technology co., NY, USA). The NDF was analyzed with a heat stable  $\alpha$ -amylase and sodium sulfite. Both NDF and ADF are expressed inclusive of residual ash.

**Table S2.** Significantly enriched predicted Level 3 KEGG pathways (relative abundance, %) on day 0 (D0), day 9 (D9), and day 12 (D12).

| Pathway level1 | Pathway level2          | Pathway level2 Description                  | D0                   | D9                   | D12                  | SEM      | <i>P</i> -value |
|----------------|-------------------------|---------------------------------------------|----------------------|----------------------|----------------------|----------|-----------------|
| Metabolism     | Carbohydrate metabolism | Amino sugar and nucleotide sugar metabolism | 1.3468 <sup>b</sup>  | 1.3568 <sup>a</sup>  | 1.3413 <sup>b</sup>  | 0.00268  | 0.0008          |
| Metabolism     | Carbohydrate metabolism | Starch and sucrose metabolism               | 0.9915 <sup>a</sup>  | 1.0018 <sup>a</sup>  | 0.9684 <sup>b</sup>  | 0.00522  | 0.0002          |
| Metabolism     | Carbohydrate metabolism | Fructose and mannose metabolism             | 0.8182 <sup>b</sup>  | 0.8306 <sup>a</sup>  | 0.8106 <sup>b</sup>  | 0.00414  | 0.0056          |
| Metabolism     | Carbohydrate metabolism | Galactose metabolism                        | 0.6893 <sup>b</sup>  | 0.7008 <sup>a</sup>  | 0.6788 <sup>c</sup>  | 0.00266  | <<br>0.0001     |
| Metabolism     | Carbohydrate metabolism | Butanoate metabolism                        | 0.7025 <sup>a</sup>  | 0.6900 <sup>b</sup>  | 0.7078 <sup>a</sup>  | 0.00360  | 0.0038          |
| Metabolism     | Carbohydrate metabolism | Pentose and glucuronate interconversions    | 0.4789 <sup>a</sup>  | 0.4787 <sup>a</sup>  | 0.4722 <sup>b</sup>  | 0.00201  | 0.0347          |
| Metabolism     | Energy metabolism       | Methane metabolism                          | 1.3460 <sup>a</sup>  | 1.3374 <sup>b</sup>  | 1.3376 <sup>b</sup>  | 0.00256  | 0.0349          |
| Metabolism     | Energy metabolism       | Carbon fixation pathways in prokaryotes     | 1.0830 <sup>b</sup>  | 1.0791 <sup>b</sup>  | 1.0976 <sup>a</sup>  | 0.00459  | 0.0173          |
| Metabolism     | Lipid metabolism        | Glycerolipid metabolism                     | 0.3465 <sup>ab</sup> | 0.3521 <sup>a</sup>  | 0.3424 <sup>b</sup>  | 0.00208  | 0.0078          |
| Metabolism     | Lipid metabolism        | Arachidonic acid metabolism                 | 0.0287 <sup>b</sup>  | 0.0280 <sup>b</sup>  | 0.0304 <sup>a</sup>  | 0.00043  | 0.0011          |
| Metabolism     | Lipid metabolism        | Steroid hormone biosynthesis                | 0.0082 <sup>b</sup>  | 0.0087 <sup>b</sup>  | 0.0101 <sup>a</sup>  | 0.00042  | 0.0080          |
| Metabolism     | Lipid metabolism        | Steroid biosynthesis                        | 0.00082 <sup>b</sup> | 0.00118 <sup>b</sup> | 0.00184 <sup>a</sup> | 0.000186 | 0.0016          |
| Metabolism     | Lipid metabolism        | Biosynthesis of unsaturated fatty acids     | 0.1177 <sup>b</sup>  | 0.1183 <sup>b</sup>  | 0.1219 <sup>a</sup>  | 0.00090  | 0.0040          |

|                                |                                             |                                                         |                       |                       |                      |          |             |
|--------------------------------|---------------------------------------------|---------------------------------------------------------|-----------------------|-----------------------|----------------------|----------|-------------|
| Metabolism                     | Lipid metabolism                            | Secondary bile acid biosynthesis                        | 0.0269 <sup>a</sup>   | 0.0279 <sup>a</sup>   | 0.0254 <sup>b</sup>  | 0.00049  | 0.0038      |
| Metabolism                     | Lipid metabolism                            | Primary bile acid biosynthesis                          | 0.0269 <sup>a</sup>   | 0.0280 <sup>a</sup>   | 0.0254 <sup>b</sup>  | 0.00049  | 0.0023      |
| Metabolism                     | Xenobiotics biodegradation and metabolism   | Polycyclic aromatic hydrocarbon degradation             | 0.0987 <sup>b</sup>   | 0.1006 <sup>a</sup>   | 0.0984 <sup>b</sup>  | 0.00054  | 0.0136      |
| Metabolism                     | Biosynthesis of other secondary metabolites | Isoquinoline alkaloid biosynthesis                      | 0.0577 <sup>ab</sup>  | 0.0565 <sup>b</sup>   | 0.0582 <sup>a</sup>  | 0.00047  | 0.0442      |
| Metabolism                     | Xenobiotics biodegradation and metabolism   | Ethylbenzene degradation                                | 0.0493 <sup>ab</sup>  | 0.0485 <sup>b</sup>   | 0.0505 <sup>a</sup>  | 0.00053  | 0.0335      |
| Metabolism                     | Xenobiotics biodegradation and metabolism   | Atrazine degradation                                    | 0.0286 <sup>b</sup>   | 0.0296 <sup>b</sup>   | 0.0314 <sup>a</sup>  | 0.00059  | 0.0069      |
| Metabolism                     | Metabolism of terpenoids and polyketides    | Biosynthesis of siderophore group nonribosomal peptides | 0.0108 <sup>b</sup>   | 0.0123 <sup>a</sup>   | 0.0113 <sup>b</sup>  | 0.00031  | 0.0076      |
| Metabolism                     | Glycan biosynthesis and metabolism          | Various types of N-glycan biosynthesis                  | 0.00029 <sup>b</sup>  | 0.00049 <sup>a</sup>  | 0.00023 <sup>b</sup> | 0.000040 | <<br>0.0001 |
| Genetic Information Processing | Replication and repair                      | Non-homologous end-joining                              | 0.00527 <sup>b</sup>  | 0.00607 <sup>ab</sup> | 0.00660 <sup>a</sup> | 0.000354 | 0.0361      |
| Genetic Information Processing | Transcription                               | Basal transcription factors                             | 0.00066 <sup>ab</sup> | 0.00083 <sup>a</sup>  | 0.00047 <sup>b</sup> | 0.00008  | 0.0125      |
| Genetic Information Processing | Translation                                 | Ribosome biogenesis in eukaryotes                       | 0.0494 <sup>b</sup>   | 0.0497 <sup>a</sup>   | 0.0494 <sup>b</sup>  | 0.00011  | 0.0448      |

|                                |                                  |                                         |                      |                       |                      |          |        |
|--------------------------------|----------------------------------|-----------------------------------------|----------------------|-----------------------|----------------------|----------|--------|
| Genetic Information Processing | Folding, sorting and degradation | Proteasome                              | 0.04784 <sup>b</sup> | 0.04813 <sup>a</sup>  | 0.04753 <sup>c</sup> | 0.000101 | 0.0007 |
| Organismal Systems             | Endocrine system                 | Insulin signaling pathway               | 0.0667 <sup>a</sup>  | 0.0683 <sup>a</sup>   | 0.0646 <sup>b</sup>  | 0.00065  | 0.0013 |
| Organismal Systems             | Excretory system                 | Proximal tubule bicarbonate reclamation | 0.0234 <sup>ab</sup> | 0.0231 <sup>b</sup>   | 0.0248 <sup>a</sup>  | 0.00048  | 0.0347 |
| Organismal Systems             | Digestive system                 | Carbohydrate digestion and absorption   | 0.0054 <sup>a</sup>  | 0.0059 <sup>a</sup>   | 0.0044 <sup>b</sup>  | 0.00030  | 0.0044 |
| Organismal Systems             | Environmental adaptation         | Circadian rhythm - plant                | 0.00029 <sup>b</sup> | 0.00044 <sup>ab</sup> | 0.00063 <sup>a</sup> | 0.000071 | 0.0055 |

SEM = standard error of the means.

<sup>a-c</sup> Means without a common superscript within a row differ significantly ( $P < 0.05$ ).

**Table S3.** The relationship of reproductive hormones and the biomarkers of the intestinal microbiota (uncorrelated results).

| Item                                 | GnRH  | FSH   | LH    | PROG  | E2    | PRL   | OT    |
|--------------------------------------|-------|-------|-------|-------|-------|-------|-------|
| <i>p__Cyanobacteria</i>              | 0.29  | 0.29  | 0.29  | 0.20  | 0.30  | 0.13  | 0.12  |
| <i>o__unclassified_c__Clostridia</i> | 0.22  | 0.06  | 0.16  | 0.11  | 0.16  | 0.05  | 0.14  |
| <i>f__Muribaculaceae</i>             | -0.08 | 0.03  | -0.16 | 0.03  | -0.23 | 0.02  | 0.01  |
| <i>f__Bacteroidaceae</i>             | -0.01 | -0.07 | -0.12 | -0.16 | 0.11  | 0.18  | -0.29 |
| <i>f__F082</i>                       | -0.08 | -0.18 | -0.07 | -0.29 | 0.12  | -0.15 | -0.11 |
| <i>f__unclassified_c__Clostridia</i> | 0.22  | 0.06  | 0.16  | 0.11  | 0.16  | 0.05  | 0.14  |
| <i>g__Prevotellaceae_UCG-004</i>     | -0.02 | -0.07 | -0.02 | 0.03  | 0.00  | 0.08  | 0.08  |
| <i>g__Bacteroides</i>                | -0.01 | -0.07 | -0.12 | -0.16 | 0.11  | 0.18  | -0.29 |
| <i>g__norank_f__Muribaculaceae</i>   | -0.09 | 0.16  | -0.08 | 0.10  | -0.22 | -0.02 | 0.12  |
| <i>g__norank_f__Oscillospiraceae</i> | -0.01 | 0.14  | 0.08  | -0.26 | 0.12  | 0.11  | -0.07 |
| <i>g__Alloprevotella</i>             | 0.04  | 0.00  | 0.01  | 0.01  | 0.30  | 0.15  | -0.15 |
| <i>g__norank_f__F082</i>             | -0.08 | -0.18 | -0.07 | -0.29 | 0.12  | -0.15 | -0.11 |
| <i>g__Agathobacter</i>               | -0.05 | -0.17 | -0.16 | -0.19 | -0.21 | 0.00  | -0.09 |
| <i>g__unclassified_c__Clostridia</i> | 0.22  | 0.06  | 0.16  | 0.11  | 0.16  | 0.05  | 0.14  |

|                               |       |                |               |              |               |              |               |
|-------------------------------|-------|----------------|---------------|--------------|---------------|--------------|---------------|
| <i>g__UCG-002</i>             | 0.08  | 0.18           | 0.21          | 0.08         | 0.22          | 0.24         | 0.16          |
| <i>p__Actinobacteriota</i>    | -0.19 | <b>-0.36*</b>  | <b>-0.24</b>  | <b>-0.13</b> | <b>-0.33*</b> | <b>-0.10</b> | <b>0.05</b>   |
| <i>p__Verrucomicrobiota</i>   | 0.25  | <b>0.36*</b>   | <b>0.36*</b>  | <b>0.32*</b> | <b>0.44**</b> | <b>0.30</b>  | <b>0.26</b>   |
| <i>p__Patescibacteria</i>     | -0.30 | <b>-0.41**</b> | <b>-0.20</b>  | <b>-0.03</b> | <b>-0.30</b>  | <b>-0.22</b> | <b>0.02</b>   |
| <i>o__Acidaminococcales</i>   | 0.23  | <b>0.27</b>    | <b>0.22</b>   | <b>0.08</b>  | <b>0.38*</b>  | <b>0.06</b>  | <b>0.01</b>   |
| <i>o__Christensenellales</i>  | -0.26 | <b>0.03</b>    | <b>0.11</b>   | <b>0.15</b>  | <b>0.16</b>   | <b>0.08</b>  | <b>0.40**</b> |
| <i>o__Saccharimonadales</i>   | -0.30 | <b>-0.41**</b> | <b>-0.20</b>  | <b>-0.03</b> | <b>-0.30</b>  | <b>-0.22</b> | <b>0.02</b>   |
| <i>o__Gastranaerophilales</i> | 0.29  | <b>0.29</b>    | <b>0.29</b>   | <b>0.20</b>  | <b>0.31*</b>  | <b>0.13</b>  | <b>0.12</b>   |
| <i>o__Verrucomicrobiales</i>  | 0.19  | <b>0.34*</b>   | <b>0.31*</b>  | <b>0.28</b>  | <b>0.41**</b> | <b>0.31*</b> | <b>0.27</b>   |
| <i>o__Coriobacteriales</i>    | -0.21 | <b>-0.32*</b>  | <b>-0.31*</b> | <b>-0.20</b> | <b>-0.27</b>  | <b>-0.12</b> | <b>0.00</b>   |
| <i>c__Vampirivibrionia</i>    | 0.19  | <b>0.34*</b>   | <b>0.31*</b>  | <b>0.28</b>  | <b>0.41**</b> | <b>0.31*</b> | <b>0.27</b>   |
| <i>c__Negativicutes</i>       | 0.20  | <b>0.25</b>    | <b>0.21</b>   | <b>0.07</b>  | <b>0.38*</b>  | <b>0.06</b>  | <b>0.01</b>   |
| <i>c__Coriobacteriia</i>      | -0.21 | <b>-0.32*</b>  | <b>-0.31*</b> | <b>-0.20</b> | <b>-0.27</b>  | <b>-0.12</b> | <b>0.00</b>   |
| <i>c__Verrucomicrobiae</i>    | 0.19  | <b>0.34*</b>   | <b>0.31*</b>  | <b>0.28</b>  | <b>0.41**</b> | <b>0.31*</b> | <b>0.27</b>   |
| <i>c__Saccharimonadia</i>     | -0.30 | <b>-0.41**</b> | <b>-0.20</b>  | <b>-0.03</b> | <b>-0.30</b>  | <b>-0.22</b> | <b>0.02</b>   |
| <i>f__Acidaminococcaceae</i>  | 0.23  | <b>0.27</b>    | <b>0.22</b>   | <b>0.08</b>  | <b>0.38*</b>  | <b>0.06</b>  | <b>0.01</b>   |

|                                                   |       |                |               |               |                |                |               |
|---------------------------------------------------|-------|----------------|---------------|---------------|----------------|----------------|---------------|
| <i>f__Christensenellaceae</i>                     | -0.26 | <b>0.03</b>    | <b>0.11</b>   | <b>0.15</b>   | <b>0.16</b>    | <b>0.08</b>    | <b>0.40**</b> |
| <i>f__Hungateiclostridiaceae</i>                  | -0.08 | <b>-0.43**</b> | <b>-0.21</b>  | <b>-0.21</b>  | <b>-0.35*</b>  | <b>-0.37*</b>  | <b>0.07</b>   |
| <i>f__norank_o__Gastranaerophilales</i>           | 0.29  | <b>0.29</b>    | <b>0.29</b>   | <b>0.20</b>   | <b>0.31*</b>   | <b>0.13</b>    | <b>0.12</b>   |
| <i>f__Akkermansiaceae</i>                         | 0.19  | <b>0.34*</b>   | <b>0.31*</b>  | <b>0.28</b>   | <b>0.41*</b>   | <b>0.31*</b>   | <b>0.27</b>   |
| <i>f__Atopobiaceae</i>                            | -0.23 | <b>-0.35*</b>  | <b>-0.35*</b> | <b>-0.36*</b> | <b>-0.38*</b>  | <b>-0.16</b>   | <b>-0.07</b>  |
| <i>f__Saccharimonadaceae</i>                      | -0.30 | <b>-0.41**</b> | <b>-0.20</b>  | <b>-0.03</b>  | <b>-0.30</b>   | <b>-0.22</b>   | <b>0.02</b>   |
| <i>g__Ruminococcus_torques_group</i>              | -0.22 | <b>-0.42**</b> | <b>-0.32*</b> | <b>-0.29</b>  | <b>-0.51#</b>  | <b>-0.17</b>   | <b>-0.22</b>  |
| <i>g__Phascolarctobacterium</i>                   | 0.24  | <b>0.27</b>    | <b>0.23</b>   | <b>0.09</b>   | <b>0.39*</b>   | <b>0.07</b>    | <b>0.01</b>   |
| <i>g__Christensenellaceae_R-7_group</i>           | -0.27 | <b>0.02</b>    | <b>0.10</b>   | <b>0.16</b>   | <b>0.15</b>    | <b>0.11</b>    | <b>0.40**</b> |
| <i>g__norank_f__Ruminococcaceae</i>               | -0.19 | <b>-0.16</b>   | <b>-0.03</b>  | <b>-0.05</b>  | <b>-0.31*</b>  | <b>0.10</b>    | <b>0.13</b>   |
| <i>g__Candidatus_Saccharimonas</i>                | -0.30 | <b>-0.41**</b> | <b>-0.20</b>  | <b>-0.03</b>  | <b>-0.30</b>   | <b>-0.22</b>   | <b>0.02</b>   |
| <i>g__norank_f__norank_o__Gastranaerophilales</i> | 0.29  | <b>0.29</b>    | <b>0.29</b>   | <b>0.20</b>   | <b>0.31*</b>   | <b>0.13</b>    | <b>0.12</b>   |
| <i>g__Akkermansia</i>                             | 0.19  | <b>0.34*</b>   | <b>0.31*</b>  | <b>0.28</b>   | <b>0.41**</b>  | <b>0.31*</b>   | <b>0.27</b>   |
| <i>g__Saccharofermentans</i>                      | -0.14 | <b>-0.37*</b>  | <b>-0.30</b>  | <b>-0.30</b>  | <b>-0.44**</b> | <b>-0.40**</b> | <b>0.06</b>   |
| <i>g__Olsenella</i>                               | -0.26 | <b>-0.34*</b>  | <b>-0.35*</b> | <b>-0.37*</b> | <b>-0.40**</b> | <b>-0.20</b>   | <b>-0.10</b>  |

---

GnRH: gonadotropin-releasing hormone, FSH: follicle-stimulating hormone, LH: luteinizing hormone, PROG: progesterone, E2: Estrogen 2, PRL: prolactin, and OT: oxytocin.
